# Supplementary material for: Adherence to Mediterranean Diet and Risk of Pancreatic Cancer: Systematic Review and Meta-Analysis
Source: MDPI journal article supplement (doi:10.3390/ijerph20032403), 2023-01-29

**Supplementary Table S1. Detailed reasons of exclusion**

| <b>References</b>                                                      | <b>n</b> | <b>Reasons of exclusion</b>                                      |
|------------------------------------------------------------------------|----------|------------------------------------------------------------------|
| Steel, 2022; Luu, 2021; Luu 2021, Julián-Serrano, 2021; Schulpen, 2018 | 5        | Conference abstract without full-text                            |
| Jiao, 2009                                                             | 1        | Results reported combining MedDiet with other lifestyle factors  |
| Barrea, 2018                                                           | 1        | Results reported combining PC with other gastrointestinal cancer |

**Supplementary Table S2. Item-by-item critical appraisal, evaluated by means of the New-Castle Ottawa Scale (NOS), of included studies, stratified by study design and reported in alphabetical order.**

**NEWCASTLE - OTTAWA QUALITY ASSESSMENT SCALE - COHORT STUDIES**

| STUDY<br><br>Author,<br>year | SELECTION                                                      |                                                        |                                              |                                                                                                      | COMPARABILITY<br><br>Comparability of<br>cohorts on the<br>basis of the design<br>or analysis<br>(Maximum: **) | Assessment of<br>outcome<br>(Maximum: *) | OUTCOME                                                                      |                                                              | TOTAL<br>SCORE |
|------------------------------|----------------------------------------------------------------|--------------------------------------------------------|----------------------------------------------|------------------------------------------------------------------------------------------------------|----------------------------------------------------------------------------------------------------------------|------------------------------------------|------------------------------------------------------------------------------|--------------------------------------------------------------|----------------|
|                              | Representativeness<br>of the exposed<br>cohort<br>(Maximum: *) | Selection of the non<br>exposed cohort<br>(Maximum: *) | Ascertainment<br>of exposure<br>(Maximum: *) | Demonstration<br>that outcome<br>of interest was<br>not present at<br>start of study<br>(Maximum: *) |                                                                                                                |                                          | Was follow-<br>up long<br>enough for<br>outcomes to<br>occur<br>(Maximum: *) | Adequacy<br>of follow<br>up of<br>cohorts<br>(Maximum:<br>*) |                |
| Bodén,<br>2019               | *                                                              | *                                                      | *                                            | *                                                                                                    | **                                                                                                             | *                                        | *                                                                            |                                                              | 8              |
| Julián-<br>Serrano,<br>2022  | *                                                              | *                                                      | *                                            | *                                                                                                    | **                                                                                                             | *                                        | *                                                                            | *                                                            | 9              |
| Luu, 2021                    | *                                                              | *                                                      | *                                            | *                                                                                                    | **                                                                                                             | *                                        | *                                                                            | *                                                            | 9              |
| Molina-<br>Montes,<br>2017   | *                                                              | *                                                      | *                                            | *                                                                                                    | **                                                                                                             | *                                        | *                                                                            | *                                                            | 9              |
| Schulpen,<br>2018            | *                                                              | *                                                      | *                                            | *                                                                                                    | **                                                                                                             | *                                        | *                                                                            | *                                                            | 9              |
| Tognon,<br>2012              | *                                                              | *                                                      | *                                            | *                                                                                                    | **                                                                                                             | *                                        | *                                                                            | *                                                            | 9              |

**NEWCASTLE - OTTAWA QUALITY ASSESSMENT SCALE - CASE CONTROL STUDIES**

| STUDY<br><br>Author,<br>year | SELECTION                                           |                                                    |                                          |                                           | COMPARABILITY<br><br>Comparability of<br>cases and controls<br>on the basis of the<br>design or analysis<br>(Maximum: **) | Ascertainment<br>of exposure<br>(Maximum: *) | OUTCOME                                                                         |                                             | TOTAL<br>SCORE |
|------------------------------|-----------------------------------------------------|----------------------------------------------------|------------------------------------------|-------------------------------------------|---------------------------------------------------------------------------------------------------------------------------|----------------------------------------------|---------------------------------------------------------------------------------|---------------------------------------------|----------------|
|                              | Is the case<br>definition adequate?<br>(Maximum: *) | Representativeness of<br>the cases<br>(Maximum: *) | Selection of<br>Controls<br>(Maximum: *) | Definition of<br>Controls<br>(Maximum: *) |                                                                                                                           |                                              | Same method<br>of<br>ascertainment<br>for cases and<br>controls<br>(Maximum: *) | Non-<br>Response<br>rate<br>(Maximum:<br>*) |                |
| Bosetti,<br>2013             | *                                                   | *                                                  | *                                        | *                                         | **                                                                                                                        | *                                            | *                                                                               | *                                           | 9              |
| Rosato,<br>2015              | *                                                   | *                                                  | *                                        | *                                         | **                                                                                                                        | *                                            | *                                                                               | *                                           | 9              |



Supplementary Figure S1. Forest plot (a) and funnel plot (b) using random effect model, of the analysis substituting alternate Mediterranean diet score with modified Mediterranean diet score, when available. The white dots represent the included studies. The white diamond represents the calculates Effect size. The black dots represent the estimated studies after the trim and fill method. The black diamond represents the estimated ES after the trim and fill method. M, F: males and females; M: males, F: females.

a)

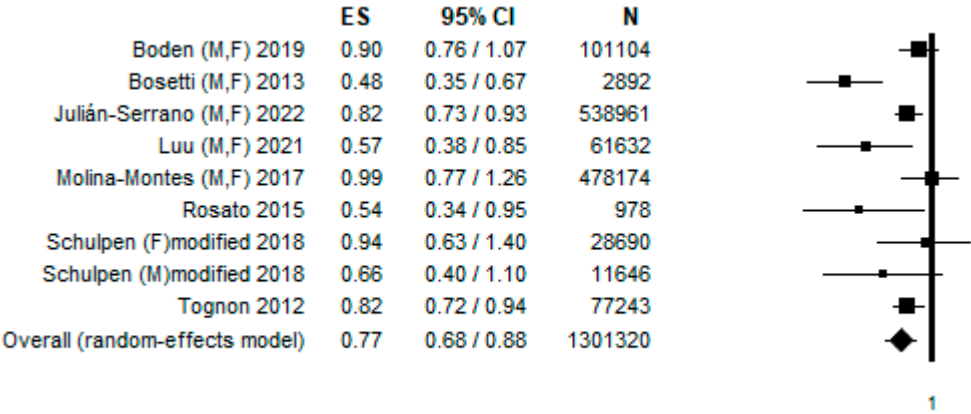

b)

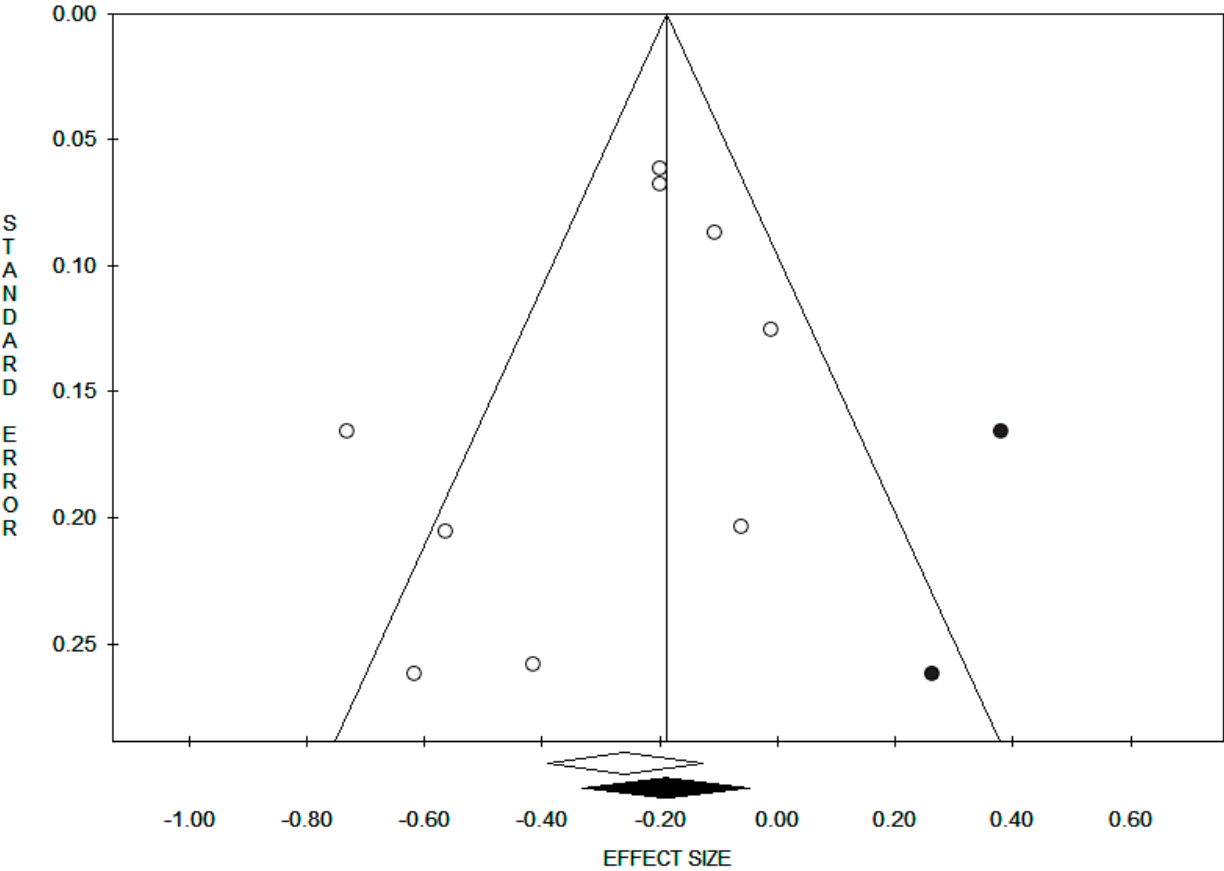

Supplementary Figure S2. Forest plot (a) and funnel plot (b) using random effect model, of the sensitivity analysis excluding potential overlapping effect. Studies are reported in alphabetical order. The white dots represent the included studies. The white diamond represents the calculates Effect size. The black dot represents the estimated studies after the trim and fill method. The black diamond represents the estimated ES after the trim and fill method. M, F: males and females; M: males, F: females.

a)

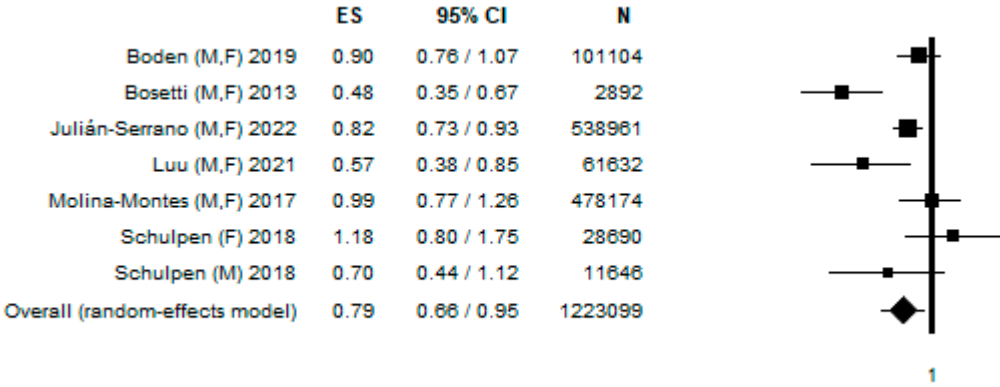

b)

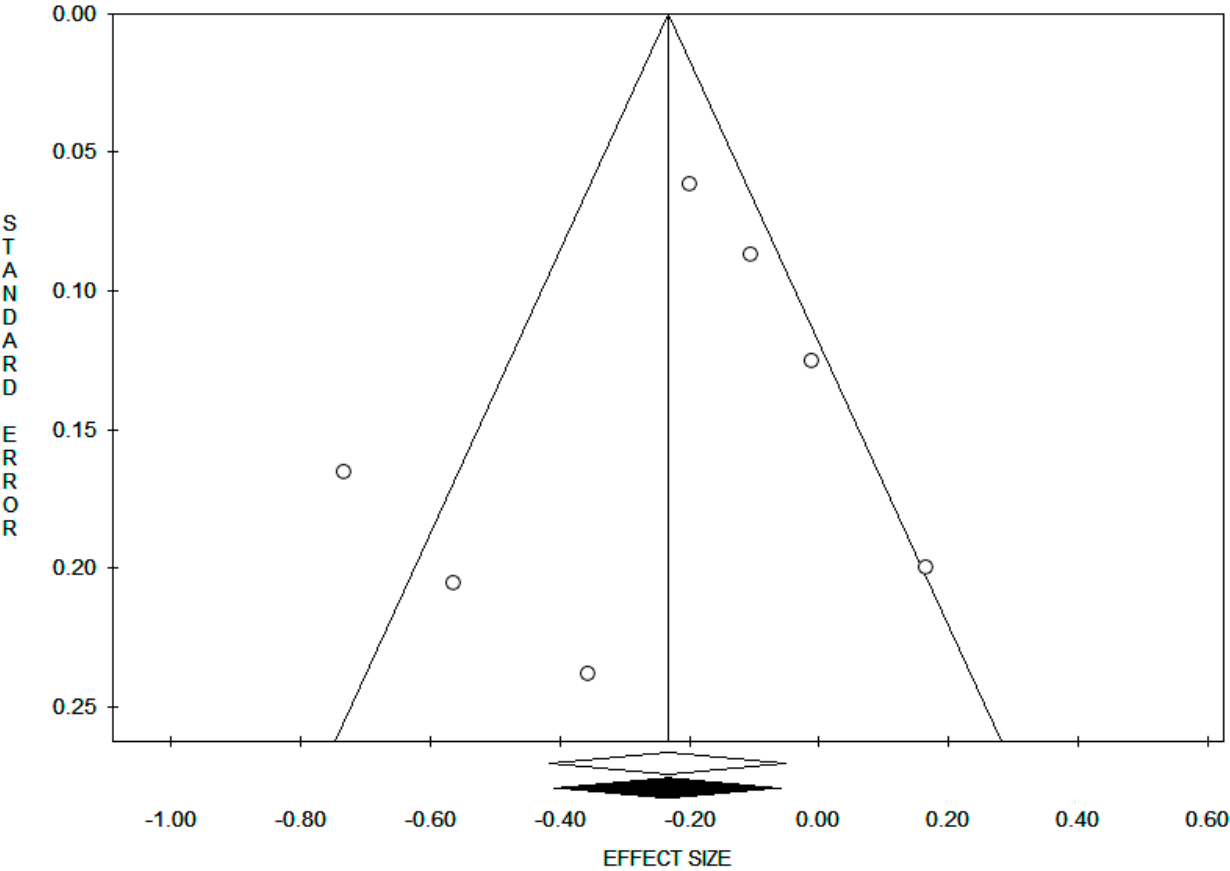

Supplementary Figure S3. Forest plot (a) and funnel plot (b) using random effect model, of the sensitivity analysis only including studies that used validated tools to assess dietary intake. Studies are reported in alphabetical order. The white dots represent the included studies. The white diamond represents the calculates Effect size. The black dot represents the estimated studies after the trim and fill method. The black diamond represents the estimated ES after the trim and fill method. M, F: males and females; M: males, F: females.

a)

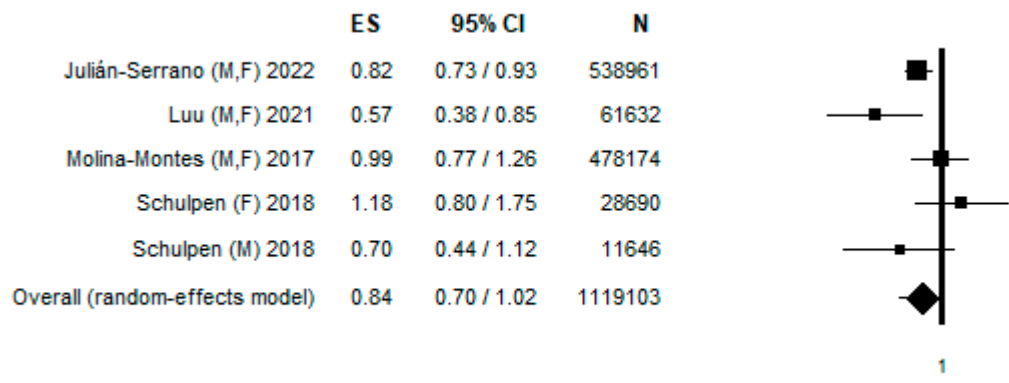

b)

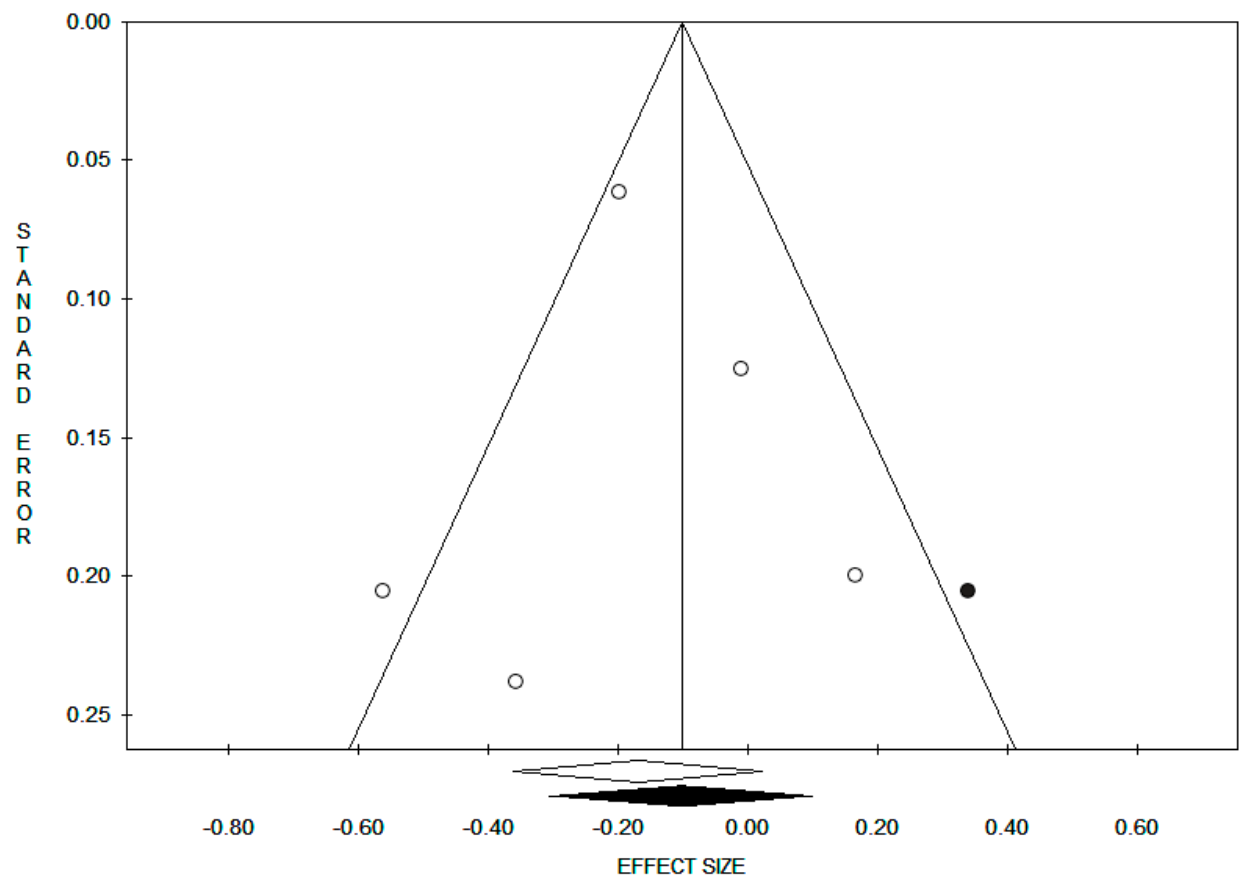

Supplementary Figure S4. Forest plot (a) and funnel plot (b) using fixed effect model, of the sensitivity analysis only including studies that used record linkage to diagnosis pancreatic cancer. Studies are reported in alphabetical order. The white dots represent the included studies. The white diamond represents the calculates Effect size. M, F: males and females; M: males, F: females.

a)

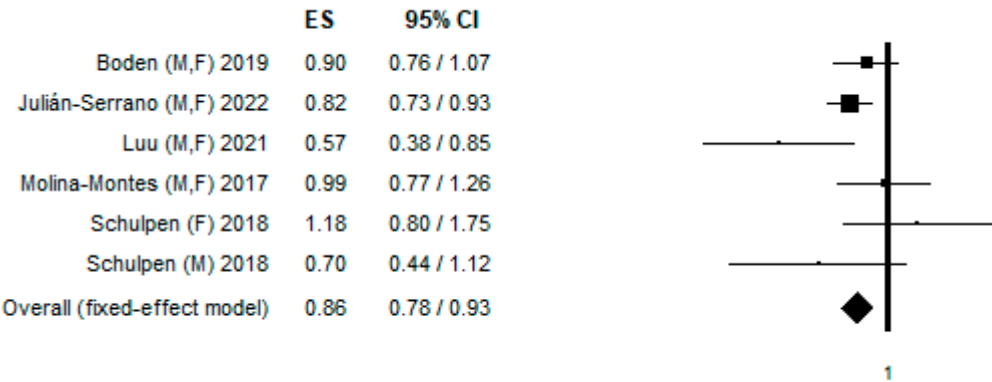

b)

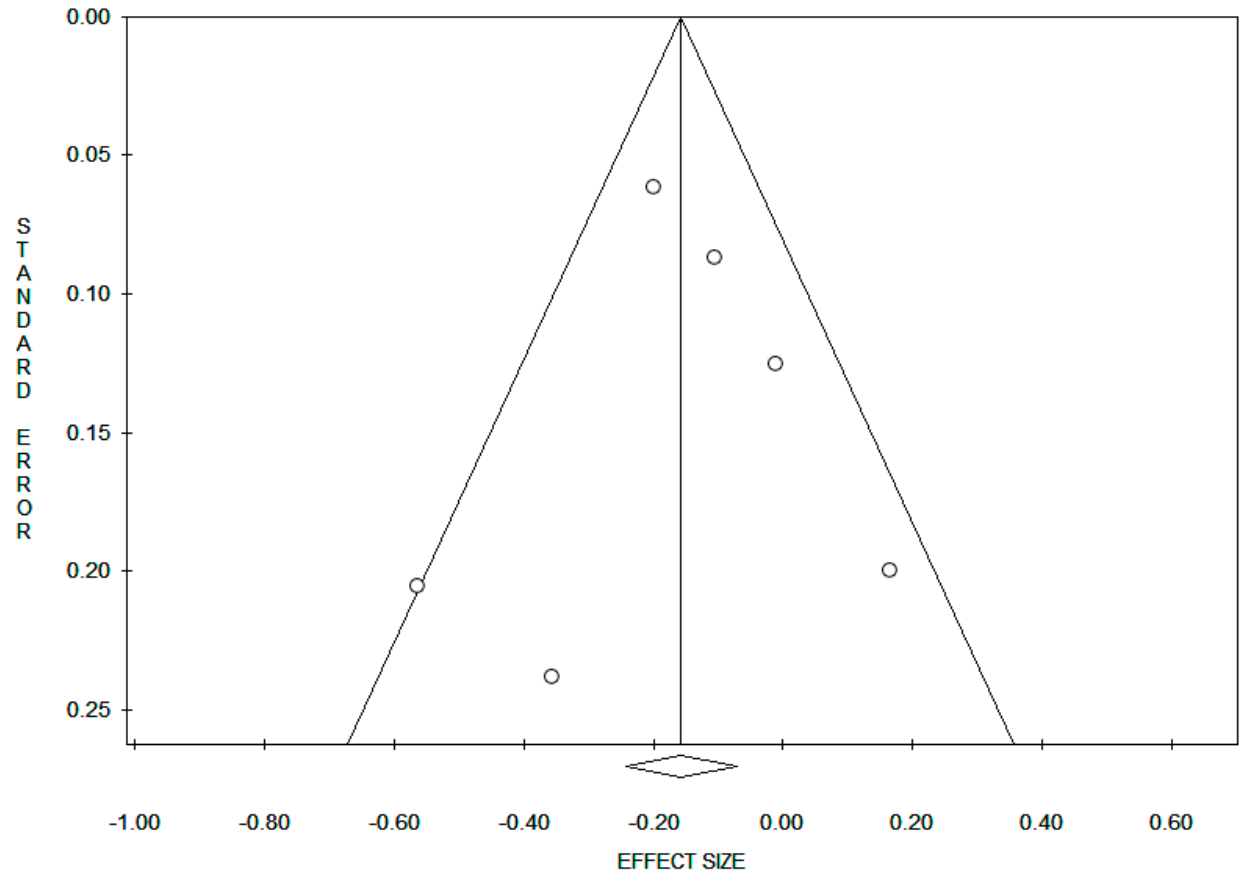

Supplementary Figure S5. Forest plot (a) and funnel plot (b) using random effect model, of the sensitivity analysis only including studies conducted in Europe. Studies are reported in alphabetical order. The white dots represent the included studies. The white diamond represents the calculates Effect size. M, F: males and females; M: males, F: females.

a)

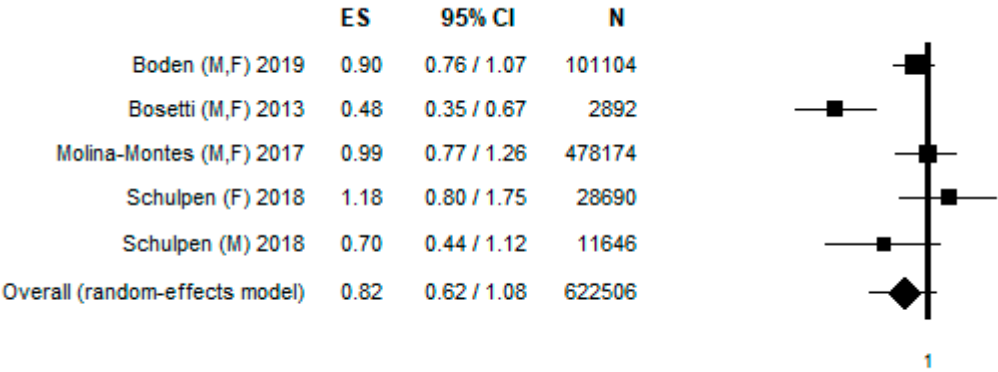

b)

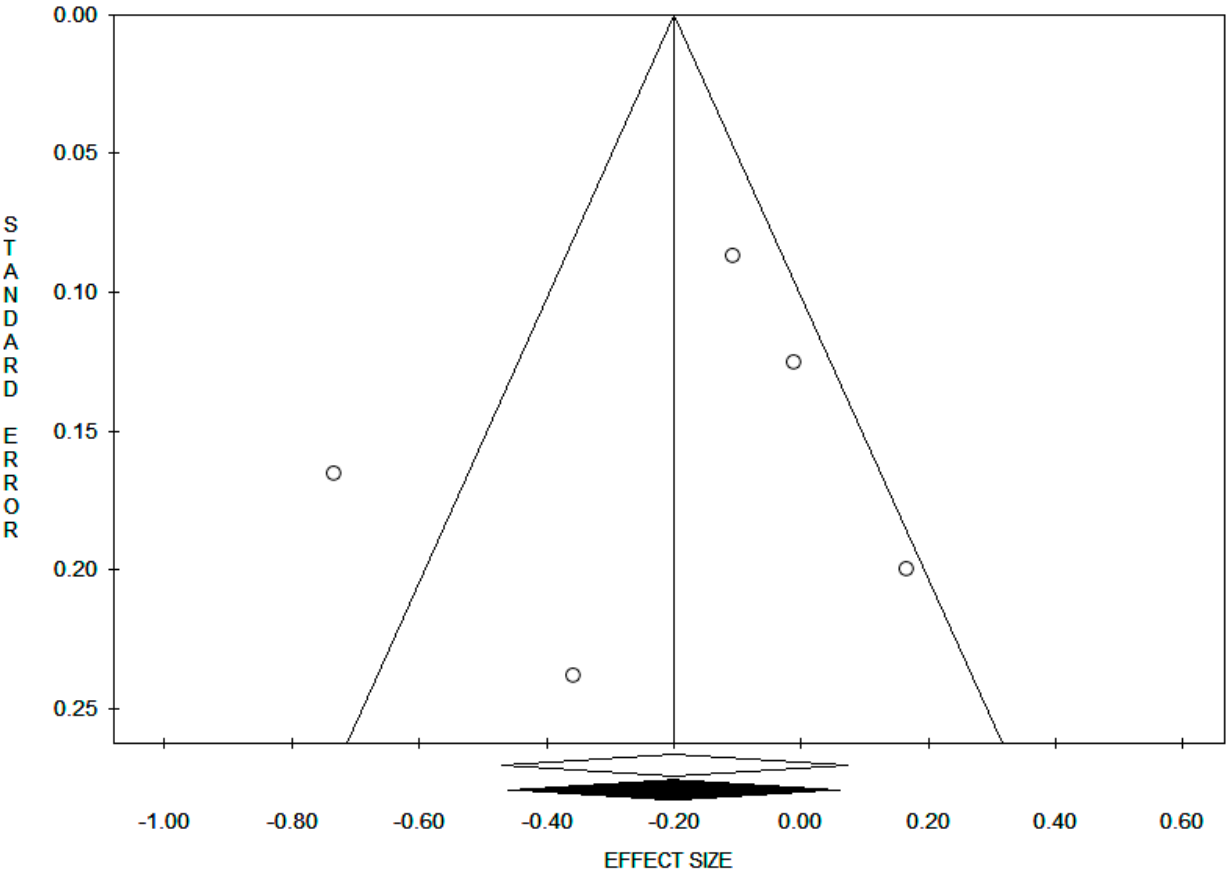



Supplementary Figure S6. Forest plot (a) and funnel plot (b) using random effect model, of the subgroup analysis only including males. Studies are reported in alphabetical order. The white dots represent the included studies. The white diamond represents the calculates Effect size. The black dots represent the estimated studies after the trim and fill method. The black diamond represents the estimated ES after the trim and fill method. M: males.

a)

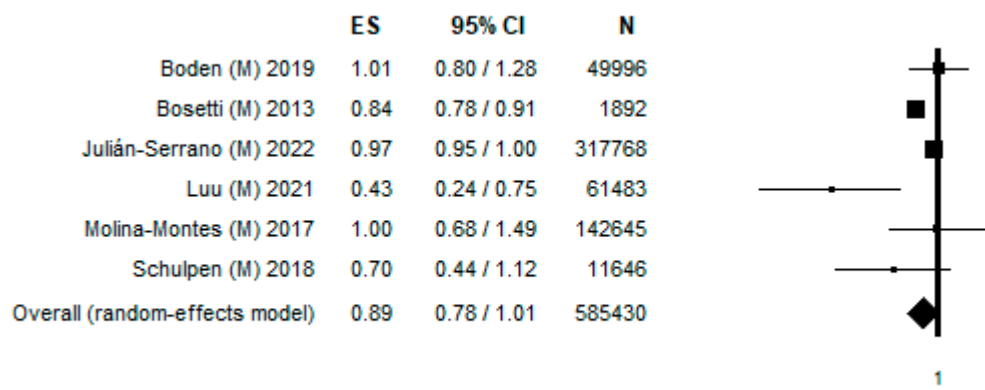

b)

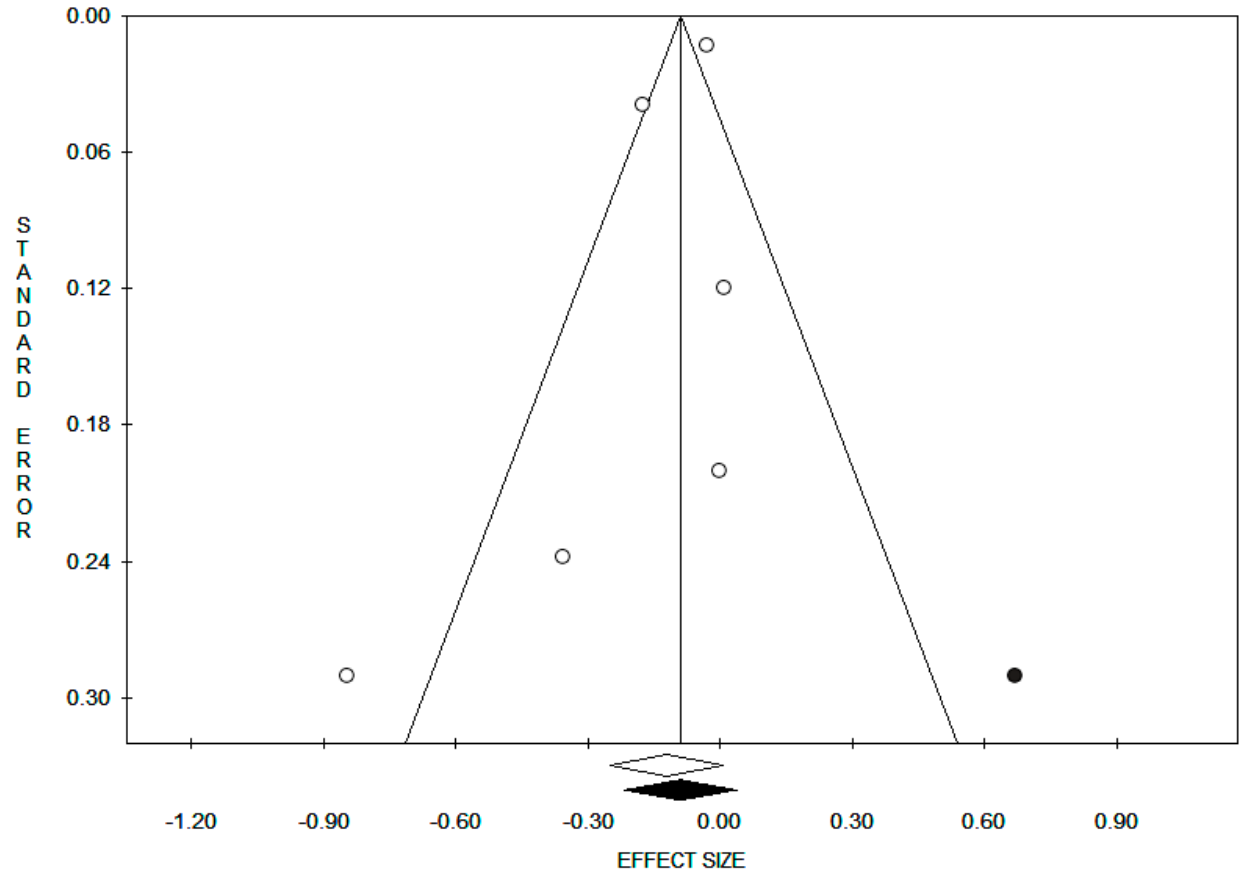

Supplementary Figure S7. Forest plot (a) and funnel plot (b) using fixed effect model, of the subgroup analysis only including females. Studies are reported in alphabetical order. The white dots represent the included studies. The white diamond represents the calculates Effect size. F: females.

a)

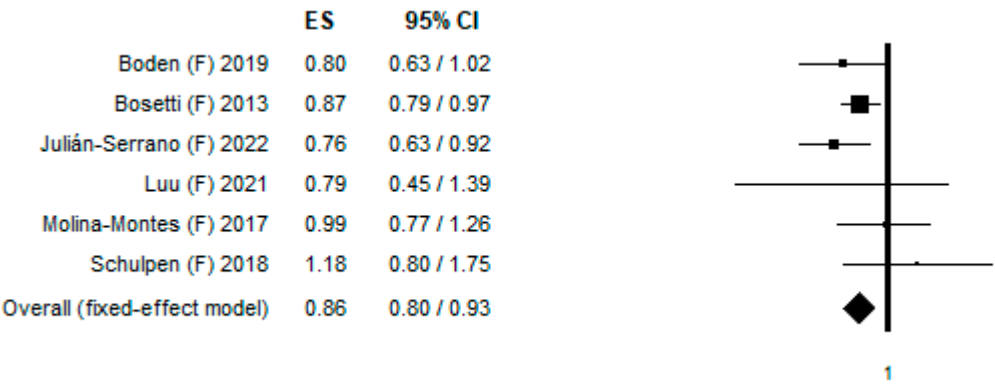

b)

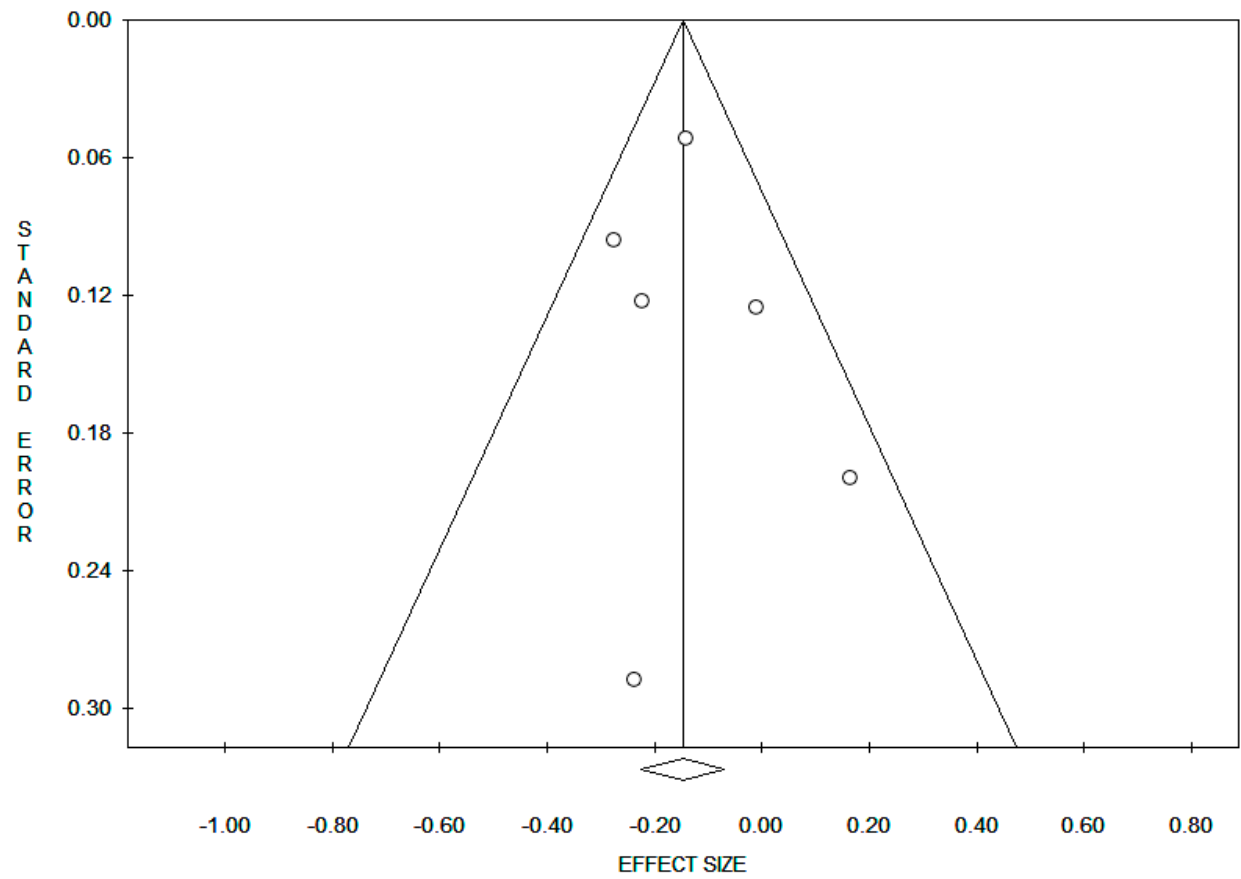

Supplementary Figure S8. Forest plot (a) and funnel plot (b) using random effect model, of the subgroup analysis based on cancer type (endocrine pancreatic cancers were excluded). Studies are reported in alphabetical order. The white dots represent the included studies. The white diamond represents the calculates Effect size. The black dot represents the estimated study after the trim and fill method. The black diamond represents the estimated ES after the trim and fill method. M, F: males and females; M: males, F: females.

a)

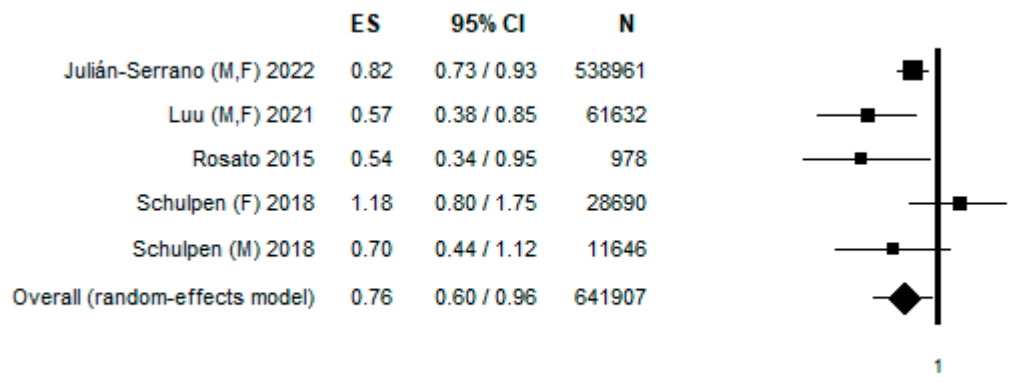

b)

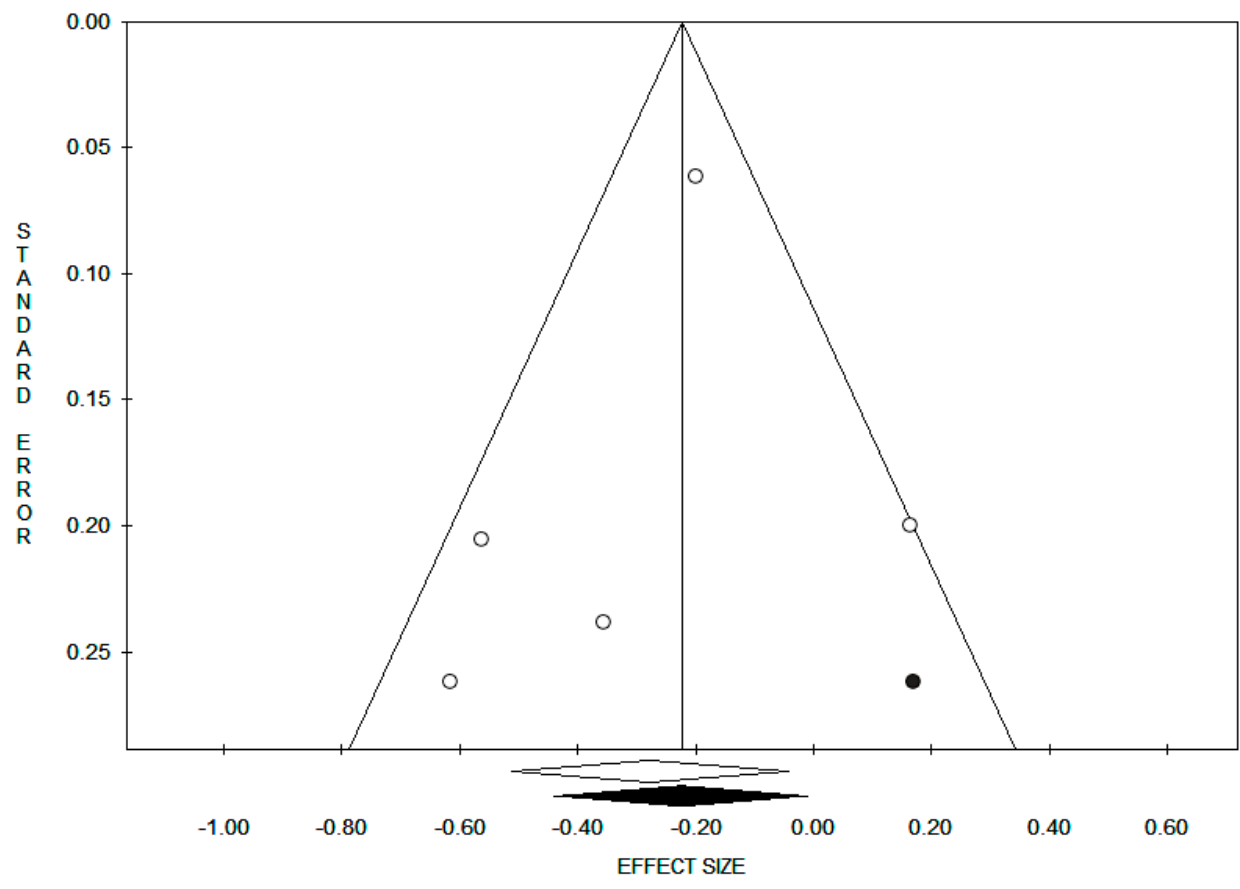

Supplement: s1 [file s1]
